# Supplementary material for: In vitro exposure of a 3D-tetraculture representative for the alveolar barrier at the air-liquid interface to silver particles and nanowires
Source: PubMed Central journal article supplement (PMC6444883; doi:10.1186/s12989-019-0297-1), 2019-04-02
Supplement: 12989_2019_297_MOESM1_ESM.pdf [file 12989_2019_297_MOESM1_ESM.pdf]

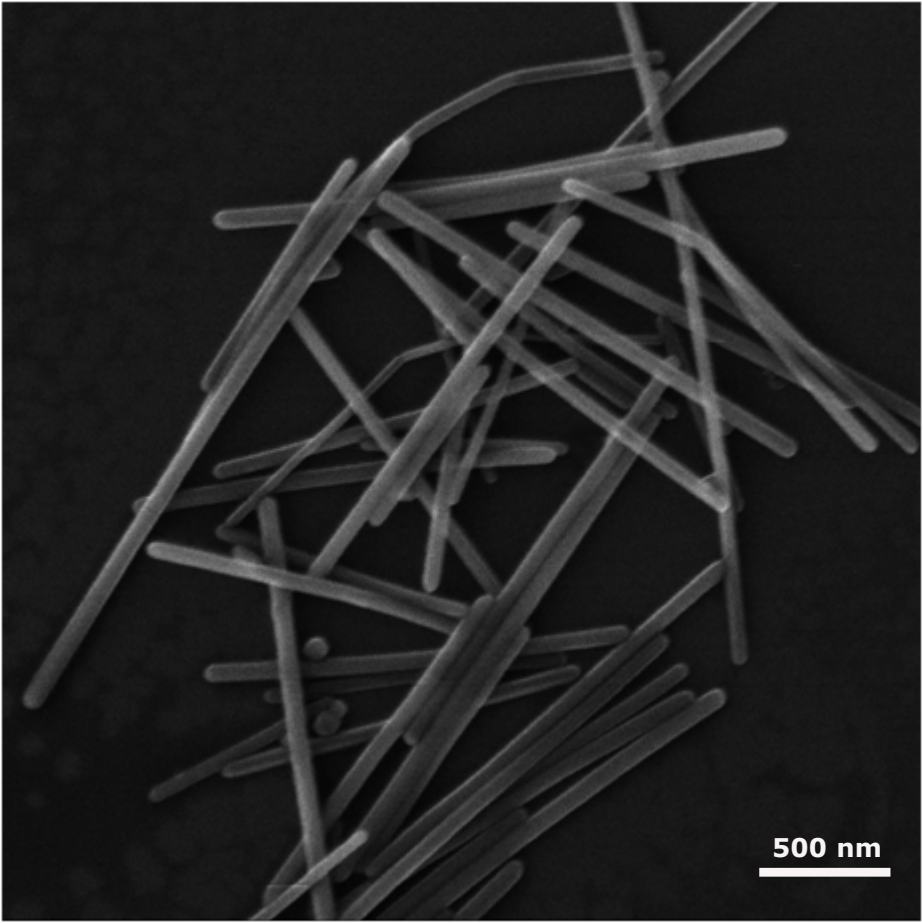

500 nm
